# Supplementary material
Source: publisher figshare collection journal article supplement (https://tandf.figshare.com/ndownloader/files/18724862)
Supplement: Supplementary file 1 [file 18724862]

# **The Role of E-skills in Technological Diversification in European Regions**

*Regional Studies*, final version, 10 October 2019

## **Appendix: Online supplemental data**

## Appendix: Online supplemental data

### Appendix A: Computation of the technology-adjusted DP (diversification potential)

Our five-step method for computing the diversification potential is based on Santoalha (2019).

#### Step 1: Computation of expected number of patents for each region i, technology z and year t

$$E(N_{izt}) = N_{it} S_{zt} \quad (1a)$$

such that:

$$N_{it} = \sum_{z=1}^n N_{izt} \quad (2a)$$

$$S_{zt} = \frac{N_{zt}}{N_t} = \frac{\sum_{i=1}^m N_{izt}}{\sum_{i=1}^m \sum_{z=1}^n N_{izt}} \quad (3a)$$

where N represents the number of patents; subscripts i, z and t refer to region i, technology z and year t; and m and n are the total number of regions and technologies existing in the sample.  $E(N_{izt})$  is the expected number of patents for each region i, technology z and year t;  $N_{it}$  represents the total number of patents in region i at time t; and  $S_{zt}$  refers to the world (all regions) share of patents for technology z at time t.

#### Step 2: Computation of expected number of specializations for each region i in year t

$$E(\text{Spec}_{it}) = \sum_{z=1}^n [E(N_{izt}) E(\text{SpecRate}_{zt})]' \quad (4a)$$

such that:

$$E(\text{SpecRate}_{zt}) = \frac{\text{NewSpec}_{zt}}{N_{zt}} = \frac{\sum_{i=1}^m \text{NewSpec}_{izt}}{\sum_{i=1}^m N_{izt}} \quad (5a)$$

$$[E(N_{izt}) E(\text{SpecRate}_{zt})]' = 1 \text{ if } E(N_{izt}) E(\text{SpecRate}_{zt}) \geq 1$$

(6a)

$$[E(N_{izt}) E(\text{SpecRate}_{zt})]' = 0 \text{ if } E(N_{izt}) E(\text{SpecRate}_{zt}) < 1$$

where  $E(\text{Spec}_{it})$  is the expected number of specializations in region  $i$  and year  $t$ .  $E(\text{SpecRate}_{zt})$  is the ratio between the number of specializations in technology  $z$  at time  $t$ , considering all regions included in the sample, and the number of patents in technology  $z$  at time  $t$ , again taking into account all regions included in the sample of observations. Condition (6a) is added to take into account the fact that the specialization status of a given region in a given technology  $z$  ( $[E(N_{izt}) E(\text{SpecRate}_{zt})]'$ ) is a dummy variable that takes the value 1 if a given region  $i$  is specialized in  $z$ , and 0 otherwise.

Step 3: Computation of number of specializations caused by existing differences between the technological structure of each region and the average technological structure prevailing in all regions

$$\text{Dif}_{it} = \sum_{z=1}^n [N_{izt} E(\text{SpecRate}_{zt})]' - E(\text{Spec}_{it}) \quad (7a)$$

such that:

$$[N_{izt} E(\text{SpecRate}_{zt})]' = 1 \text{ if } N_{izt} E(\text{SpecRate}_{zt}) \geq 1$$

(8a)

$$[N_{izt} E(\text{SpecRate}_{zt})]' = 0 \text{ if } N_{izt} E(\text{SpecRate}_{zt}) < 1$$

where  $\text{Dif}_{it}$  represents the number of specializations in region  $i$  and year  $t$  that are attributed to differences existing between the technological structure of region  $i$  at  $t$ , and the average technological structure prevailing in all regions in year  $t$ .

Step 4: Computation of number of technology-adjusted specializations in each region  $i$  in year

$t$

$$\text{AdjustedSpec}_{it} = \sum_{z=1}^n \text{Spec}_{izt} - \text{Dif}_{it} \quad (9a)$$

such that:

$$\text{Spec}_{izt} = 1 \text{ if } \text{RCA}_{izt} > 1 \quad (10a)$$

$$\text{Spec}_{izt} = 0 \text{ if } \text{RCA}_{izt} \leq 1$$

where  $\text{AdjustedSpec}_{it}$  represents the total number of technology-adjusted specializations in region  $i$  and year  $t$ , and  $\text{Spec}_{izt}$  is a dummy variable that reflects the specialization status of a given region  $i$  in technology  $z$  in year  $t$ . It takes the value 1 if a given region  $i$  has RCA (Revealed Comparative Advantage) greater than 1, and 0 otherwise.

Step 5: Computation of the technology-adjusted diversification potential for each region  $i$  in year  $t$

$$\text{AdjustedDivPotential}_{it} = n - \text{AdjustedSpec}_{it} \quad (11a)$$

where  $\text{AdjustedDivPotential}_{it}$  is the sector-adjusted diversification potential of a given region  $i$  in year  $t$ .

## Appendix B: Computation of the relatedness variable

To capture the extent to which new regional technological specializations at time  $t+1$  are related to the specializations of the region at time  $t$ , we compute the degree of proximity (DoP) between pairs of technologies. We follow the formula below, where  $a$  and  $b$  represent two different technological fields  $z$ , and RCA is defined as in (1b):

$$\Omega_{ab} = \min \{P(RCA_a > 1 \mid RCA_b > 1), P(RCA_b > 1 \mid RCA_a > 1)\}, \quad (1b)$$

$$\text{where } P(RCA_a > 1 \mid RCA_b > 1) = \frac{P(RCA_a > 1 \cap RCA_b > 1)}{P(RCA_b > 1)} \quad (2b)$$

In (2b)  $\Omega_{ab}$  indicates the DoP between technologies  $a$  and  $b$ , while the expression  $P(RCA_a > 1 \mid RCA_b > 1)$  represents the conditional probability of there being, in the sample, cases where technology  $a$  has an  $RCA > 1$  given that for technology  $b$   $RCA > 1$ . For computing  $\Omega_{ab}$ , one observation represents a pair region-year that is associated with a given technology  $z$  RCA. In total, the sample consists of 3097 pairs of regions and years (2000–2013). The DoP between two technological fields is computed based on the frequency of finding the spatial co-occurrence of a specialization ( $RCA > 1$ ) in these fields.

The proximity between each new technological specialization  $z$  in region  $i$  and its pre-existing technological structure follows Santoalha and Boschma (2019):

$$\text{Proximity}_{izt-t+1} = \frac{\sum_{s=1}^n \Omega_{zs} \text{Mist}}{\sum_{s=1}^n \text{Mist}} \quad (3b)$$

such that:

$$\text{Mist} = 1 \text{ if } RCA_{ist} > 1 \quad (4b)$$

$$M_{ist} = 0 \text{ if } RCA_{ist} \leq 1$$

where  $M_{ist}$  is a dummy variable that takes the value 1 if region  $i$  has a specialization in technology  $s$  at time  $t$ , and 0 otherwise.  $Proximity_{izt-t+1}$ , which ranges between 0 and 1, represents the proximity of a given new technological specialization  $z$  in region  $i$  at time  $t+1$ , to time  $t$  regional technological structure of specializations. Briefly, (3b) is the average of the DoP between  $z$  and the technological specializations  $s$  existing in region  $i$  at time  $t$ . This represents an adaptation of the density index proposed by Hausmann and Klinger (2007).\*

Finally, for computing the average relatedness underlying the technological diversification process of region  $i$ , between time  $t$  and  $t+1$ , we propose the following formula:

$$Relatedness_{Sit-t+1} = \frac{\sum_{z=1}^{xit+1} Proximity_{izt-t+1}}{xit+1} \quad (5b)$$

$Relatedness_{Sit-t+1}$  represents the average of the proximities of all technologies  $z$  in which a given region acquires a new specialization at time  $t+1$ .

---

\* The use of the density indicator as proposed by Hausmann and Klinger (2007) would imply an almost perfect positive correlation (0.995) between the number of technological specializations of the region at time  $t$  and the density indicator itself. The use of (3b) mitigates this problem, as it leads to a negative and moderate correlation between (5b) and the number of technological specializations of the region at time  $t$  (-0.343).

## **Appendix C: E-skill variables**

Our main source of information for constructing the e-skill Task Intensity index was the first edition of the European Classification of Skills/Competences, Qualifications and Occupations (ESCO) by the European Commission (2013), freely accessible at <https://ec.europa.eu/esco/portal/skill>. Information is organized by associating 12,575 work skills for which a textual description is available to 429 jobs at 4-digit level according to the 2008 International Standard Classification of Occupations (ISCO) classification. Occupations are subsequently aggregated to 1-digit level and matched with employment data from the EU Labour Force Survey. To identify e-skills we analysed the textual description contained in the ESCO portal to select work skills explicitly associated with the use of automated processes, by using the terms ‘computer’ and ‘technolog\*’ as search criteria. Because those terms are broad, we ran specific checks to exclude items that were not associated with automated processes. For instance, following this rationale we discarded items such as ‘computer history’ or ‘cutting technologies’. That yielded 69 e-skill items:

**Table C1**

| <b>idskill</b> | <b>eskills</b>                                             |
|----------------|------------------------------------------------------------|
| 1              | 3D body-scanning technologies                              |
| 2              | adapt to changes in technological development plans        |
| 3              | adapt to new technology used in cars                       |
| 4              | add computer components                                    |
| 5              | advise customers on type of computer equipment             |
| 6              | anticipate change in car technology                        |
| 7              | assess the necessity of new farming technologies           |
| 8              | automation technology                                      |
| 9              | Biotechnology                                              |
| 10             | biotechnology in aquaculture                               |
| 11             | building systems monitoring technology                     |
| 12             | call-centre technologies                                   |
| 13             | cloud technologies                                         |
| 14             | combine business technology with user experience           |
| 15             | computer engineering                                       |
| 16             | computer equipment                                         |
| 17             | computer forensics                                         |
| 18             | computer programming                                       |
| 19             | computer science                                           |
| 20             | computer technology                                        |
| 21             | computerized feeding systems                               |
| 22             | control objectives for information and related technology  |
| 23             | coordinate technological activities                        |
| 24             | define technology strategy                                 |
| 25             | design computer network                                    |
| 26             | develop technological improvement strategies               |
| 27             | emergent technologies                                      |
| 28             | evaluate translation technologies                          |
| 29             | explain characteristics of computer peripheral equipment   |
| 30             | handle geospatial technologies                             |
| 31             | have computer literacy                                     |
| 32             | human-computer interaction                                 |
| 33             | keep up-to-date to computer trends                         |
| 34             | lead technology development of an organization             |
| 35             | learning technologies                                      |
| 36             | maintain computer hardware                                 |
| 37             | manage computer-based transport operation control systems; |
| 38             | maritime transportation technology                         |
| 39             | medical imaging technology                                 |
| 40             | medical laboratory technology                              |
| 41             | monitor developments in technology used for design         |
| 42             | monitor technology trends                                  |
| 43             | Nanotechnology                                             |



- |    |                                                         |
|----|---------------------------------------------------------|
| 44 | operate 3D computer graphics software                   |
| 45 | operate computerized control systems                    |
| 46 | operate on-board computer systems                       |
| 47 | place orders for computer products                      |
| 48 | provide training on technological business developments |
| 49 | put uncut recordings into computer                      |
| 50 | renewable energy technologies                           |
| 51 | research remote sensing technologies                    |
| 52 | support service users in using technological aids       |
| 53 | teach computer science                                  |
| 54 | teach medical laboratory technology principles          |
| 55 | teach transport technology principles                   |
| 56 | tend computer numerical control lathe machine           |
| 57 | test computer hardware                                  |
| 58 | transfer uncut audiovisual material to computer         |
| 59 | transmission technology                                 |
| 60 | use a computer                                          |
| 61 | use computer programs to improve patients' skills       |
| 62 | use computer telephony integration                      |
| 63 | use computer-aided engineering systems                  |
| 64 | use computer-aided translation                          |
| 65 | use computerized maintenance management systems         |
| 66 | use e-health and mobile health technologies             |
| 67 | use shorthand computer program                          |
| 68 | use specialized computer models for weather forecasting |
| 69 | utilize computer-aided software engineering tools       |

**Table C2. Task intensity index, by occupation and type of e-skills**

|   | ISCO Code                                          | Total   | Developer | Practitioner | User    |
|---|----------------------------------------------------|---------|-----------|--------------|---------|
| 1 | Managers                                           | -0.4169 | -0.2937   | -0.3055      | -0.7005 |
| 2 | Professionals                                      | 2.2013  | 2.3447    | 2.3302       | 1.5502  |
| 3 | Technicians and associate professionals            | 1.1840  | 0.9235    | 0.9695       | 1.7122  |
| 4 | Clerical Support Workers                           | -0.4296 | -0.5941   | -0.5541      | 0.0269  |
| 5 | Services and Sales Workers                         | -0.5122 | -0.5099   | -0.4461      | -0.5644 |
| 6 | Skilled Agricultural, Forestry and Fishery Workers | -0.3410 | -0.5941   | -0.4619      | 0.2041  |
| 7 | Craft and Related Trades Workers                   | -0.3603 | -0.2642   | -0.3651      | -0.4235 |
| 8 | Plant and Machine Operators And Assemblers         | -0.6024 | -0.4181   | -0.5419      | -0.8512 |
| 9 | Elementary Occupations                             | -0.7229 | -0.5941   | -0.6251      | -0.9538 |

## Appendix D: Additional empirical results

Figure D1: Distribution of e-skills across European regions

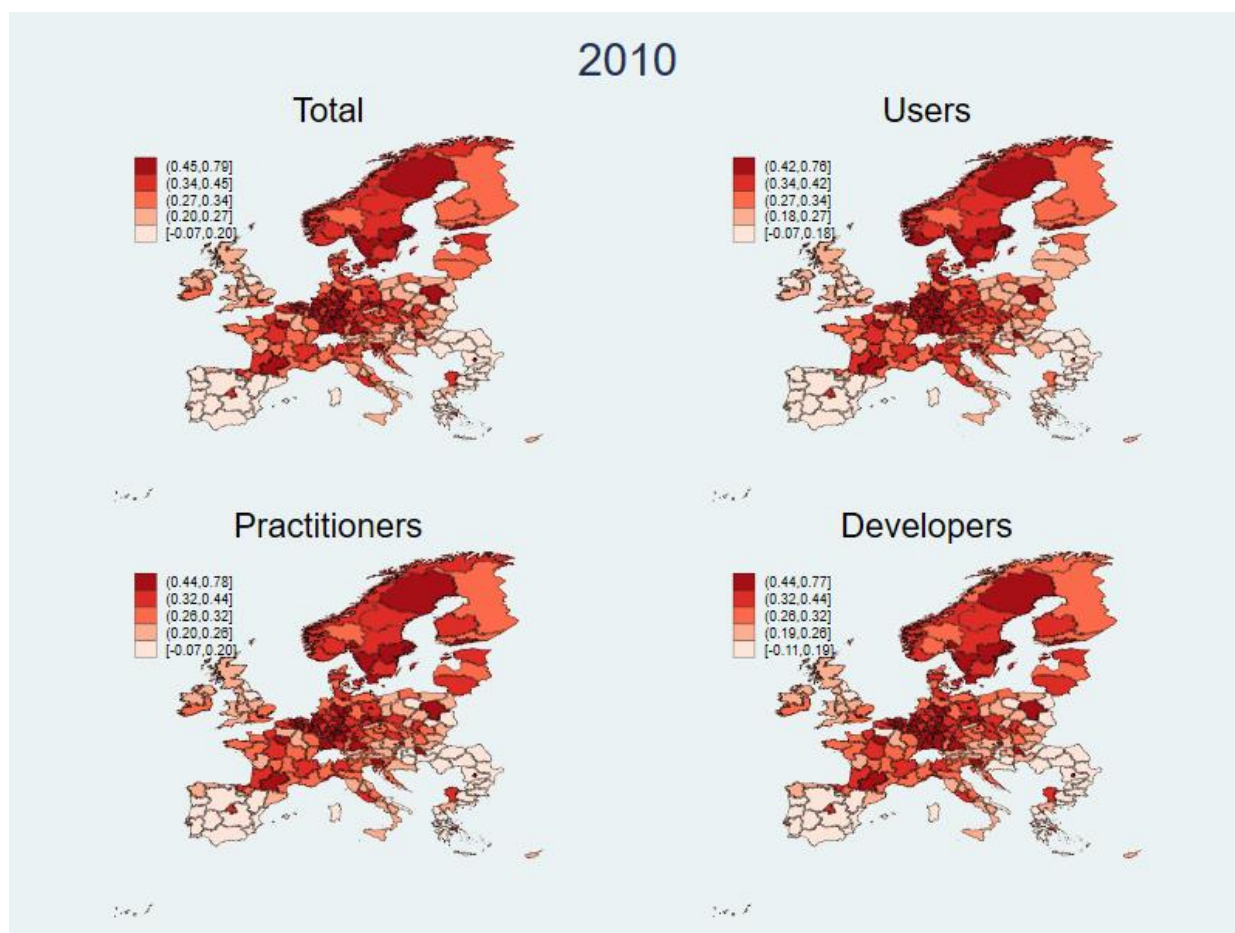

Source: authors' computations

**Table D1. Descriptive statistics**

| <b>Variables</b>                        | <b>N</b> | <b>mean</b> | <b>max</b> | <b>min</b> | <b>std dev</b> |
|-----------------------------------------|----------|-------------|------------|------------|----------------|
| N new specializations                   | 2445     | 12.20       | 33         | 1          | 5.90           |
| Diversification                         | 2445     | 0.13        | 0.39       | 0.008      | 0.07           |
| Eskills intensity - Total (std)         | 2445     | 0.28        | 0.79       | -0.20      | 0.15           |
| Eskills intensity - Users (std)         | 2445     | 0.28        | 0.76       | -0.17      | 0.14           |
| Eskills intensity - Practitioners (std) | 2445     | 0.27        | 0.78       | -0.21      | 0.15           |
| Eskills intensity - Developers (std)    | 2445     | 0.26        | 0.77       | -0.23      | 0.15           |
| GDP per capita                          | 2445     | 22457       | 68400      | 4000       | 8746           |
| R&D                                     | 2445     | 1.38        | 8.37       | 0.06       | 1.15           |
| Share female workers                    | 2445     | 0.44        | 0.53       | 0.28       | 0.04           |
| Share elderly population                | 2445     | 0.17        | 0.27       | 0.10       | 0.03           |
| Relatedness                             | 2445     | 0.26        | 0.48       | 0.05       | 0.03           |

**Table D2. Correlation matrix.**

|                               | N new<br>specializ. |     | Diversification |     | Eskills -<br>Total (std) |     | Eskills -<br>Users (std) |     | Eskills -<br>Practitioners<br>(std) |     | Eskills -<br>Developers<br>(std) |     | GDP per<br>capita |     | R&D    |     | Share female<br>workers |     | Share elderly<br>population |    | Relatedness |  |
|-------------------------------|---------------------|-----|-----------------|-----|--------------------------|-----|--------------------------|-----|-------------------------------------|-----|----------------------------------|-----|-------------------|-----|--------|-----|-------------------------|-----|-----------------------------|----|-------------|--|
| N new specializ.              | 1                   |     |                 |     |                          |     |                          |     |                                     |     |                                  |     |                   |     |        |     |                         |     |                             |    |             |  |
| Diversification               | 0.953               | *** | 1               |     |                          |     |                          |     |                                     |     |                                  |     |                   |     |        |     |                         |     |                             |    |             |  |
| Eskills - Total (std)         | 0.268               | *** | 0.321           | *** | 1                        |     |                          |     |                                     |     |                                  |     |                   |     |        |     |                         |     |                             |    |             |  |
| Eskills - Users (std)         | 0.247               | *** | 0.302           | *** | 0.964                    | *** | 1                        |     |                                     |     |                                  |     |                   |     |        |     |                         |     |                             |    |             |  |
| Eskills - Practitioners (std) | 0.268               | *** | 0.321           | *** | 0.997                    | *** | 0.941                    | *** | 1                                   |     |                                  |     |                   |     |        |     |                         |     |                             |    |             |  |
| Eskills - Developers (std)    | 0.273               | *** | 0.323           | *** | 0.994                    | *** | 0.931                    | *** | 0.999                               | *** | 1                                |     |                   |     |        |     |                         |     |                             |    |             |  |
| GDP per capita                | 0.308               | *** | 0.380           | *** | 0.656                    | *** | 0.625                    | *** | 0.659                               | *** | 0.650                            | *** | 1                 |     |        |     |                         |     |                             |    |             |  |
| R&D                           | 0.260               | *** | 0.319           | *** | 0.599                    | *** | 0.573                    | *** | 0.601                               | *** | 0.593                            | *** | 0.499             | *** | 1      |     |                         |     |                             |    |             |  |
| Share female workers          | 0.109               | *** | 0.132           | *** | 0.289                    | *** | 0.313                    | *** | 0.281                               | *** | 0.271                            | *** | 0.040             | *   | 0.276  | *** | 1                       |     |                             |    |             |  |
| Share elderly population      | 0.159               | *** | 0.169           | *** | 0.085                    | *** | 0.124                    | *** | 0.072                               | *** | 0.070                            | *** | 0.177             | *** | 0.115  | *** | -0.084                  | *** | 1                           |    |             |  |
| Relatedness                   | -0.192              | *** | -0.278          | *** | -0.379                   | *** | -0.359                   | *** | -0.380                              | *** | -0.377                           | *** | -0.309            | *** | -0.375 | *** | -0.177                  | *** | 0.042                       | ** | 1           |  |

\* p<0.1, \*\* p<0.05, \*\*\* p<0.01

**Table D3. Tests of hypotheses 2 and 3. Marginal effects of e-skills.**  
**Model specifications including interactions of e-skills with GDP per capita and relatedness. Fixed effects panel estimations (panel composed of different sub-periods).**

|                  |                          | 3-year sub-<br>periods | 4-year sub-<br>periods | 5-year sub-<br>periods |                         |                   |
|------------------|--------------------------|------------------------|------------------------|------------------------|-------------------------|-------------------|
|                  |                          |                        |                        |                        | GDP per<br>capita level | Relatedness level |
| Specification ix | E-skills - Total         | 7.11 ***               | 6.31 **                | 8.80 *                 | GDP pc = min            |                   |
|                  |                          | 5.82 ***               | 4.73 **                | 6.63 *                 | GDP pc = Q1             |                   |
|                  |                          | 5.34 ***               | 4.10 **                | 5.79                   | GDP pc = Q2             | Relatedness = min |
|                  |                          | 4.82 ***               | 3.51 **                | 4.96                   | GDP pc = Q3             |                   |
|                  |                          | 0.91                   | -1.04                  | -1.83                  | GDP pc = max            |                   |
|                  | E-skills - Total         | 3.62 ***               | 4.08 ***               | 5.57 **                | GDP pc = min            |                   |
|                  |                          | 2.40 ***               | 3.08 ***               | 3.19 *                 | GDP pc = Q1             |                   |
|                  |                          | 1.94 **                | 2.68 **                | 2.28                   | GDP pc = Q2             | Relatedness = Q2  |
|                  |                          | 1.45 *                 | 2.30 **                | 1.36                   | GDP pc = Q3             |                   |
|                  |                          | -2.27                  | -0.59                  | -6.07 **               | GDP pc = max            |                   |
|                  | E-skills - Total         | -2.03                  | -1.79                  | 2.72                   | GDP pc = min            |                   |
|                  |                          | -3.16                  | -1.28                  | 0.17                   | GDP pc = Q1             |                   |
|                  |                          | -3.58 *                | -1.08                  | -0.82                  | GDP pc = Q2             | Relatedness = max |
|                  |                          | -4.03 **               | -0.89                  | -1.80 *                | GDP pc = Q3             |                   |
|                  |                          | -7.44                  | 0.59                   | -9.79 ***              | GDP pc = max            |                   |
| Specification x  | E-skills - Users         | 6.48 ***               | 6.03 *                 | 13.58 *                | GDP pc = min            |                   |
|                  |                          | 5.03 ***               | 4.63 **                | 9.07 **                | GDP pc = Q1             |                   |
|                  |                          | 4.48 ***               | 4.08 **                | 7.34                   | GDP pc = Q2             | Relatedness = min |
|                  |                          | 3.90 **                | 3.56 *                 | 5.61                   | GDP pc = Q3             |                   |
|                  |                          | -0.51                  | -0.47                  | -8.46                  | GDP pc = max            |                   |
|                  | E-skills - Users         | 3.45 ***               | 4.17 ***               | 5.50 **                | GDP pc = min            |                   |
|                  |                          | 2.10 ***               | 3.05 **                | 3.69                   | GDP pc = Q1             |                   |
|                  |                          | 1.60 **                | 2.61 **                | 2.99                   | GDP pc = Q2             | Relatedness = Q2  |
|                  |                          | 1.06                   | 2.19 *                 | 2.29                   | GDP pc = Q3             |                   |
|                  |                          | -3.02 *                | -1.02                  | -3.36                  | GDP pc = max            |                   |
|                  | E-skills - Users         | -1.47                  | -0.74                  | -1.61                  | GDP pc = min            |                   |
|                  |                          | -2.64                  | -1.11                  | -1.05                  | GDP pc = Q1             |                   |
|                  |                          | -3.08                  | -1.26                  | -0.84                  | GDP pc = Q2             | Relatedness = max |
|                  |                          | -3.55 *                | -1.40                  | -0.62                  | GDP pc = Q3             |                   |
|                  |                          | -7.11                  | -2.47                  | 1.13                   | GDP pc = max            |                   |
| Specification xi | E-skills - Practitioners | 7.25 ***               | 6.31 **                | 7.59 *                 | GDP pc = min            |                   |
|                  |                          | 6.05 ***               | 4.68 **                | 5.88 *                 | GDP pc = Q1             |                   |
|                  |                          | 5.60 ***               | 4.03 **                | 5.22                   | GDP pc = Q2             | Relatedness = min |
|                  |                          | 5.12 ***               | 3.43 **                | 4.56                   | GDP pc = Q3             |                   |
|                  |                          | 1.47                   | -1.28                  | -0.77                  | GDP pc = max            |                   |

|                   |                          |          |          |           |              |                   |
|-------------------|--------------------------|----------|----------|-----------|--------------|-------------------|
| Specification xi  | E-skills - Practitioners | 3.65 *** | 3.99 *** | 5.57 ***  | GDP pc = min | Relatedness = Q2  |
|                   |                          | 2.44 *** | 3.01 *** | 3.01 *    | GDP pc = Q1  |                   |
|                   |                          | 2.00 *** | 2.62 **  | 2.03      | GDP pc = Q2  |                   |
|                   |                          | 1.51 *   | 2.26 **  | 1.04      | GDP pc = Q3  |                   |
|                   |                          | -2.14    | -0.55    | -6.94 **  | GDP pc = max |                   |
|                   | E-skills - Practitioners | -2.20    | -2.15    | 3.79      | GDP pc = min | Relatedness = max |
|                   |                          | -3.41 *  | -1.39    | 0.49      | GDP pc = Q1  |                   |
|                   |                          | -3.86 ** | -1.09    | -0.78     | GDP pc = Q2  |                   |
|                   |                          | -4.34 ** | -0.81    | -2.05     | GDP pc = Q3  |                   |
|                   |                          | -8.01    | 1.37     | -12.37    | GDP pc = max |                   |
| Specification xii | E-skills - Developers    | 7.14 *** | 6.39 **  | 6.90 *    | GDP pc = min | Relatedness = min |
|                   |                          | 5.98 *** | 4.74 **  | 5.58 *    | GDP pc = Q1  |                   |
|                   |                          | 5.54 *** | 4.08 **  | 5.07      | GDP pc = Q2  |                   |
|                   |                          | 5.07 *** | 3.46 **  | 4.56      | GDP pc = Q3  |                   |
|                   |                          | 1.54     | -1.31    | 0.44      | GDP pc = max |                   |
|                   | E-skills - Developers    | 3.73 *** | 4.03 *** | 5.58 ***  | GDP pc = min | Relatedness = Q2  |
|                   |                          | 2.52 *** | 3.05 *** | 2.90 **   | GDP pc = Q1  |                   |
|                   |                          | 2.07 *** | 2.66 **  | 1.87      | GDP pc = Q2  |                   |
|                   |                          | 1.59 **  | 2.30 **  | 0.84      | GDP pc = Q3  |                   |
|                   |                          | -2.07    | -0.53    | -7.51 *** | GDP pc = max |                   |
|                   | E-skills - Developers    | -1.81    | -2.19    | 4.42      | GDP pc = min | Relatedness = max |
|                   |                          | -3.08 *  | -1.39    | 0.55      | GDP pc = Q1  |                   |
|                   |                          | -3.56 *  | -1.07    | -0.94     | GDP pc = Q2  |                   |
|                   |                          | -4.07 ** | -0.77    | -2.43     | GDP pc = Q3  |                   |
|                   |                          | -7.93    | 1.55     | -14.51    | GDP pc = max |                   |

\* p<0.1, \*\* p<0.05, \*\*\* p<0.01

3-year sub-periods: 2002–2004; 2005–2007; 2008–2010; 2011–2013

4-year sub-periods: 2002–2005; 2006–2009; 2010–2013

5-year sub-periods: 2003–2007; 2008–2012

**Table D4. Tests of hypotheses 2 and 3. Marginal effects of e-skills.**  
**Model specifications including interactions of e-skills with GDP per capita and relatedness. Model controlling for industry structure. Fixed effects and GMM estimations (annual data).**

|                  |                          | FE       |           | Difference<br>GMM |                         |                   |
|------------------|--------------------------|----------|-----------|-------------------|-------------------------|-------------------|
|                  |                          |          |           |                   | GDP per<br>capita level | Relatedness level |
| Specification ix | E-skills - Total         | 6.67 *** | 11.94 *** | GDP pc = min      |                         |                   |
|                  |                          | 4.87 *** | 5.81 ***  | GDP pc = Q1       |                         |                   |
|                  |                          | 4.19 *** | 3.58 *    | GDP pc = Q2       | Relatedness = min       |                   |
|                  |                          | 3.53 *** | 1.30      | GDP pc = Q3       |                         |                   |
|                  |                          | -2.29    | -18.18 ** | GDP pc = max      |                         |                   |
|                  | E-skills - Total         | 2.01 *** | 5.40 **   | GDP pc = min      |                         |                   |
|                  |                          | 1.66 *** | 3.80 **   | GDP pc = Q1       |                         |                   |
|                  |                          | 1.54 *** | 3.21 *    | GDP pc = Q2       | Relatedness = Q2        |                   |
|                  |                          | 1.41 **  | 2.62 *    | GDP pc = Q3       |                         |                   |
|                  |                          | 0.31     | -2.48     | GDP pc = max      |                         |                   |
|                  | E-skills - Total         | -2.98    | -4.10     | GDP pc = min      |                         |                   |
|                  |                          | -1.75    | 0.87      | GDP pc = Q1       |                         |                   |
|                  |                          | -1.30    | 2.69      | GDP pc = Q2       | Relatedness = max       |                   |
|                  |                          | -0.85    | 4.54      | GDP pc = Q3       |                         |                   |
|                  |                          | 3.08     | 20.36     | GDP pc = max      |                         |                   |
| Specification x  | E-skills - Users         | 5.91 *   | 8.36 **   | GDP pc = min      |                         |                   |
|                  |                          | 4.16 **  | 4.99 *    | GDP pc = Q1       |                         |                   |
|                  |                          | 3.51 **  | 3.76      | GDP pc = Q2       | Relatedness = min       |                   |
|                  |                          | 2.86 **  | 2.50      | GDP pc = Q3       |                         |                   |
|                  |                          | -2.79    | -8.24     | GDP pc = max      |                         |                   |
|                  | E-skills - Users         | 2.09 **  | 3.94 *    | GDP pc = min      |                         |                   |
|                  |                          | 1.78 *** | 2.87 *    | GDP pc = Q1       |                         |                   |
|                  |                          | 1.66 *** | 2.48      | GDP pc = Q2       | Relatedness = Q2        |                   |
|                  |                          | 1.54 *** | 2.08      | GDP pc = Q3       |                         |                   |
|                  |                          | 0.54     | -1.33     | GDP pc = max      |                         |                   |
|                  | E-skills - Users         | -1.99    | -2.50     | GDP pc = min      |                         |                   |
|                  |                          | -0.76    | -0.22     | GDP pc = Q1       |                         |                   |
|                  |                          | -0.31    | 0.61      | GDP pc = Q2       | Relatedness = max       |                   |
|                  |                          | 0.14     | 1.46      | GDP pc = Q3       |                         |                   |
|                  |                          | 4.09     | 8.72      | GDP pc = max      |                         |                   |
| Specification xi | E-skills - Practitioners | 6.80 *** | 12.96 *** | GDP pc = min      |                         |                   |
|                  |                          | 5.03 *** | 6.08 ***  | GDP pc = Q1       |                         |                   |
|                  |                          | 4.38 *** | 3.58 *    | GDP pc = Q2       | Relatedness = min       |                   |
|                  |                          | 3.72 *** | 1.02      | GDP pc = Q3       |                         |                   |
|                  |                          | -1.97    | -20.84 ** | GDP pc = max      |                         |                   |



|                   |                          |          |           |              |                   |
|-------------------|--------------------------|----------|-----------|--------------|-------------------|
| Specification xi  | E-skills - Practitioners | 2.01 *** | 5.87 **   | GDP pc = min | Relatedness = Q2  |
|                   |                          | 1.63 *** | 4.14 **   | GDP pc = Q1  |                   |
|                   |                          | 1.49 *** | 3.51 **   | GDP pc = Q2  |                   |
|                   |                          | 1.36 **  | 2.86 *    | GDP pc = Q3  |                   |
|                   |                          | 0.15     | -2.65     | GDP pc = max |                   |
|                   | E-skills - Practitioners | -3.11    | -4.45     | GDP pc = min | Relatedness = max |
|                   |                          | -2.00 *  | 1.30      | GDP pc = Q1  |                   |
|                   |                          | -1.58    | 3.40      | GDP pc = Q2  |                   |
|                   |                          | -1.17    | 5.54      | GDP pc = Q3  |                   |
|                   |                          | 2.41     | 23.82     | GDP pc = max |                   |
| Specification xii | E-skills - Developers    | 6.51 *** | 13.38 *** | GDP pc = min | Relatedness = min |
|                   |                          | 4.85 *** | 6.30 ***  | GDP pc = Q1  |                   |
|                   |                          | 4.23 *** | 3.72 *    | GDP pc = Q2  |                   |
|                   |                          | 3.62 *** | 1.09      | GDP pc = Q3  |                   |
|                   |                          | -1.73    | -21.39 ** | GDP pc = max |                   |
|                   | E-skills - Developers    | 1.97 **  | 5.77 **   | GDP pc = min | Relatedness = Q2  |
|                   |                          | 1.62 *** | 4.10 **   | GDP pc = Q1  |                   |
|                   |                          | 1.49 *** | 3.49 **   | GDP pc = Q2  |                   |
|                   |                          | 1.36 **  | 2.87 *    | GDP pc = Q3  |                   |
|                   |                          | 0.23     | -2.45     | GDP pc = max |                   |
|                   | E-skills - Developers    | -2.89    | -5.28     | GDP pc = min | Relatedness = max |
|                   |                          | -1.84 *  | 0.90      | GDP pc = Q1  |                   |
|                   |                          | -1.45    | 3.15      | GDP pc = Q2  |                   |
|                   |                          | -1.06    | 5.46      | GDP pc = Q3  |                   |
|                   |                          | 2.32     | 25.11 *   | GDP pc = max |                   |

\* p<0.1, \*\* p<0.05, \*\*\* p<0.01.

**Table D5. RESET misspecification test (Ramsey regression equation specification error test). Fixed effects panel estimations (annual data)**

| Model Specification                         |      | p-value of the Ramsey RESET test |
|---------------------------------------------|------|----------------------------------|
| Only e-skills                               | i    | 0.01                             |
|                                             | ii   | 0.05                             |
|                                             | iii  | 0.00                             |
|                                             | iv   | 0.00                             |
| e-skills + control variables                | v    | 0.04                             |
|                                             | vi   | 0.02                             |
|                                             | vii  | 0.07                             |
|                                             | viii | 0.06                             |
| e-skills + controls + interaction variables | ix   | 0.44                             |
|                                             | x    | 0.26                             |
|                                             | xi   | 0.31                             |
|                                             | xii  | 0.18                             |

Note: Ramsey Regression Equation Specification Error Test (RESET) includes in each model specification, as regressors, the squared, cubic and quadratic fitted values, and tests if their coefficients are statistically different from 0. The null hypothesis is that there is no misspecification / the model is well specified (i.e. the coefficients of the three regressors are equal 0).
